# Supplementary material for: Coligand-directed synthesis of five Co(ii)/Ni(ii) coordination polymers with a neutral tetradentate ligand: syntheses, crystal structures, and properties
Source: Royal Society of Chemistry journal article supplement (doi:10.1039/c4dt01535e), 2014-01-01
Supplement: c4dt01535e1.pdf [file c4dt01535e1.pdf]

## Coligand-directed synthesis of five Co(II)/Ni(II) coordination polymers with neutral tetradentate ligand: syntheses, crystal structures, and properties

Ling Qin,<sup>a</sup> Zhong-Jie Wang,<sup>b</sup> Ting Wang,<sup>a</sup> He-Gen Zheng<sup>\*,a</sup> Jin-Xi Chen<sup>\*,b</sup>

<sup>a</sup>State Key Laboratory of Coordination Chemistry, School of Chemistry and Chemical Engineering, Nanjing National Laboratory of Microstructures, Nanjing University, Nanjing 210093, P. R. China

E-mail: [zhenghg@nju.edu.cn](mailto:zhenghg@nju.edu.cn) (H.-G.Z.). Fax: 86-25-83314502.

<sup>b</sup>School of Chemistry and Chemical Engineering, Southeast University, Nanjing 211189, P. R. China

The PLATON SQUEEZE procedure was used to treat regions of diffuse solvent which could not be sensibly modelled in terms of atomic sites. Their contribution to the diffraction pattern was removed and modified  $F_o^2$  written to a new HKL file. For compound 1, the number of electrons thus located is 1400 per unit cell. This residual electron density was assigned to two molecules of DMF, [1400/16 = 87.5e per one ligand; two molecules of the DMF would give 80e].

For compound 3, the number of electrons thus located is 149 per unit cell. This residual electron density was assigned to two molecules of DMF, [149/2 = 75e per one ligand; four molecules of the water and one and a half  $CH_3CN$  would give 73e].

---

<sup>a</sup>State Key Laboratory of Coordination Chemistry, School of Chemistry and Chemical Engineering, Nanjing National Laboratory of Microstructures, Nanjing University, Nanjing 210093, P. R. China

E-mail: [zhenghg@nju.edu.cn](mailto:zhenghg@nju.edu.cn) (H.-G.Z.). Fax: 86-25-83314502.

<sup>b</sup>School of Chemistry and Chemical Engineering, Southeast University, Nanjing 211189, P. R. China

† Electronic supplementary information (ESI) available: IR, PXRD, Uv-vis, the selected bond lengths and angles. CCDC: 1002453 for 2, 1002454 for 1, 1002455 for 5, 1002456 for 4, 1002457 for 3. For ESI and crystallographic data in CIF or other electronic format see DOI: 10.1039/

For compound 4, the number of electrons thus located is 168 per unit cell. This residual electron density was assigned to eight molecules of water, [ $168/1 = 84e$  per two ligand;  $84/2 = 42e$  per one ligand; four molecules of the water would give  $40e$ ].

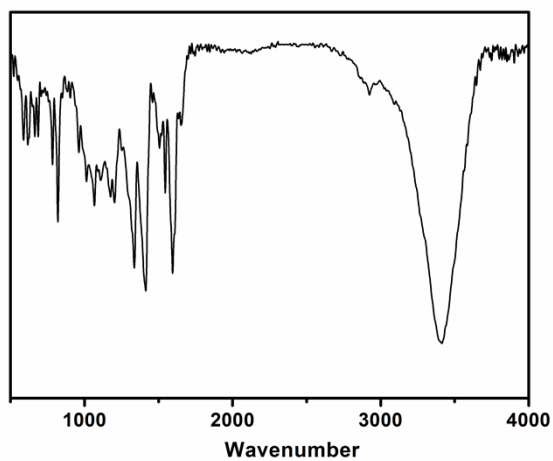

Figure S1. IR of complex 1

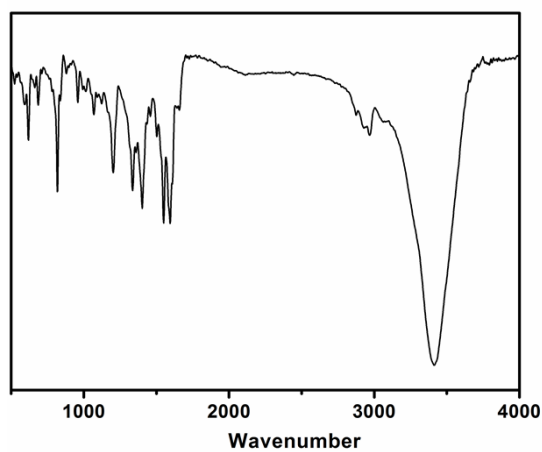

Figure S2. IR of complex 2

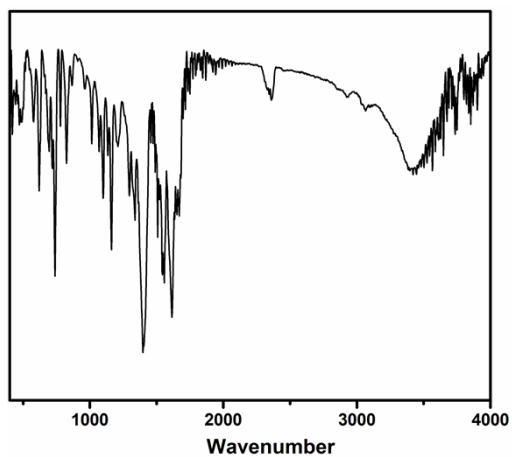

Figure S3. IR of complex 3

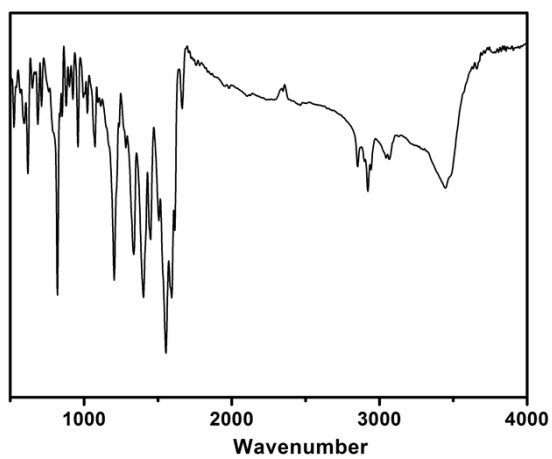

Figure S4. IR of complex 5

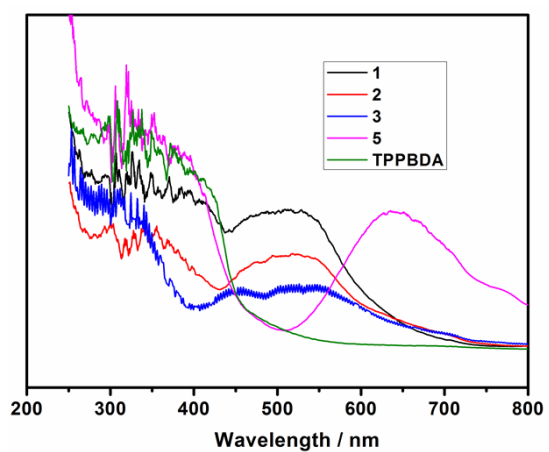

Figure S5. UV-vis absorbance spectra of 1-3 and 5 at room temperature

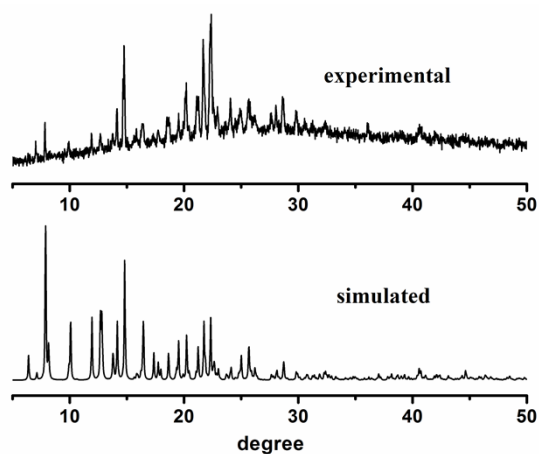

Figure S6. Powder X-ray diffraction patterns of complex 1

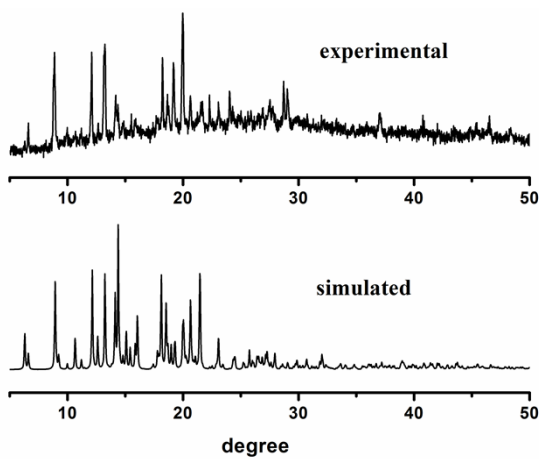

Figure S7. Powder X-ray diffraction patterns of complex 2

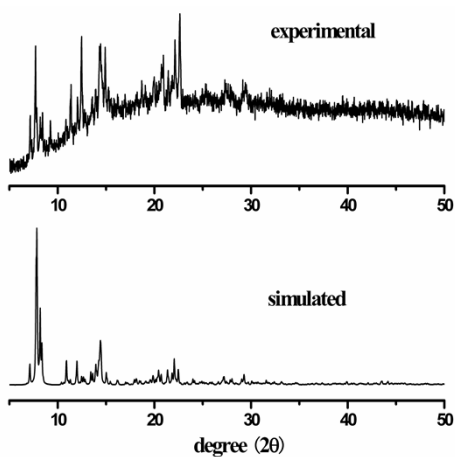

Figure S8. Powder X-ray diffraction patterns of complex 3

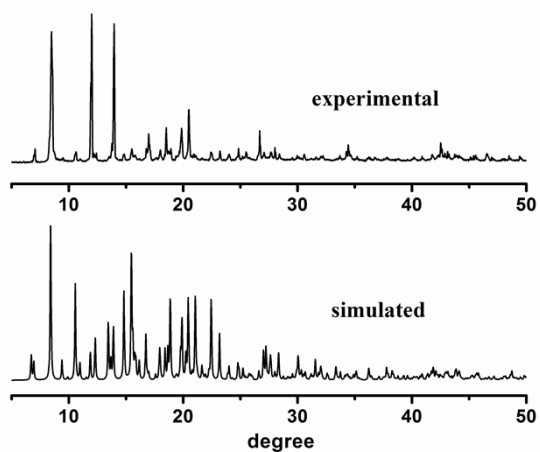

Figure S9. Powder X-ray diffraction patterns of complex **5**

### Complex 1

|                           |            |                                        |            |
|---------------------------|------------|----------------------------------------|------------|
| Co1- N1                   | 2.203(3)   | Co1- N3 <sup>a</sup>                   | 2.219(2)   |
| Co1- N4 <sup>b</sup>      | 2.109(2)   | Co1- O2                                | 2.110(2)   |
| Co1- O3                   | 2.162(2)   | Co1- O4                                | 2.046(2)   |
| N1 - Co1- N3 <sup>a</sup> | 173.25(10) | N1 - Co1- N4 <sup>b</sup>              | 91.00(9)   |
| N1 - Co1- O2              | 89.76(9)   | N1 - Co1- O3                           | 89.30(9)   |
| N1 - Co1- O4              | 91.41(10)  | N3 <sup>a</sup> - Co1- N4 <sup>b</sup> | 88.65(9)   |
| N3 <sup>a</sup> - Co1- O2 | 83.85(9)   | N3 <sup>a</sup> - Co1- O3              | 89.57(9)   |
| N3 <sup>a</sup> - Co1- O4 | 95.31(10)  | N4 <sup>b</sup> - Co1- O2              | 105.83(9)  |
| N4 <sup>b</sup> - Co1- O3 | 167.36(9)  | N4 <sup>b</sup> - Co1- O4              | 97.91(10)  |
| O2- Co1- O3               | 61.53(8)   | O2- Co1- O4                            | 156.21(10) |
| O3- Co1- O4               | 94.72(10)  |                                        |            |

### Complex 2

|                           |            |                           |           |
|---------------------------|------------|---------------------------|-----------|
| Co1- N1                   | 2.179(3)   | Co1- N2 <sup>a</sup>      | 2.117(4)  |
| Co1- O2                   | 2.230(3)   | Co1- O3                   | 2.128(3)  |
| Co1- O4 <sup>b</sup>      | 2.051(3)   | Co1- O1W                  | 2.083(3)  |
| N1 - Co1- N2 <sup>a</sup> | 85.82(14)  | N1 - Co1- O2              | 87.19(13) |
| N1 - Co1- O3              | 88.90(13)  | N1 - Co1- O4 <sup>b</sup> | 88.25(13) |
| N1 - Co1- O1W             | 178.77(13) | N2 <sup>a</sup> - Co1- O2 | 96.69(13) |

|                            |            |                                        |           |
|----------------------------|------------|----------------------------------------|-----------|
| N2 <sup>a</sup> - Co1- O3  | 155.82(13) | N2 <sup>a</sup> - Co1- O4 <sup>b</sup> | 95.00(14) |
| N2 <sup>a</sup> - Co1- O1W | 93.27(14)  | O2 - Co1- O3                           | 59.45(12) |
| O2 - Co1- O4 <sup>b</sup>  | 167.11(13) | O2 - Co1- O1W                          | 93.75(13) |
| O3 - Co1- O4 <sup>b</sup>  | 108.43(13) | O3- Co1- O1W                           | 92.26(13) |
| O4 <sup>b</sup> - Co1- O1W | 91.01(13)  |                                        |           |

### Complex 3

|                                         |            |                                         |            |
|-----------------------------------------|------------|-----------------------------------------|------------|
| Co1- N1                                 | 2.140(3)   | Co1- N3 <sup>a</sup>                    | 2.172(3)   |
| Co1- O2                                 | 2.025(3)   | Co1- O8                                 | 2.106(2)   |
| Co1- O9                                 | 2.337(2)   | Co1- O13 <sup>b</sup>                   | 2.084(3)   |
| Co2- N2 <sup>c</sup>                    | 2.186(3)   | Co2- N4 <sup>d</sup>                    | 2.122(3)   |
| Co2- O7 <sup>e</sup>                    | 2.060(3)   | Co2- O15                                | 2.049(2)   |
| Co2- O18 <sup>f</sup>                   | 2.011(3)   | Co3- O3                                 | 2.101(2)   |
| Co3- O6 <sup>e</sup>                    | 2.223(2)   | Co3- O9                                 | 2.199(2)   |
| Co3- O14                                | 2.077(2)   | Co3- O19 <sup>f</sup>                   | 2.059(3)   |
| Co3- O1w                                | 2.060(3)   | N1 - Co1- N3 <sup>a</sup>               | 88.84(12)  |
| N1 - Co1- O2                            | 99.84(11)  | N1 - Co1- O8                            | 95.56(10)  |
| N1 - Co1- O9                            | 153.97(10) | N1 - Co1- O13 <sup>b</sup>              | 83.98(11)  |
| N3 <sup>a</sup> - Co1- O2               | 91.11(12)  | N3 <sup>a</sup> - Co1- O8               | 91.52(11)  |
| N3 <sup>a</sup> - Co1- O9               | 91.88(10)  | N3 <sup>a</sup> - Co1- O13 <sup>b</sup> | 172.11(12) |
| O2- Co1- O8                             | 164.42(10) | O2- Co1- O9                             | 106.16(9)  |
| O2- Co1- O13 <sup>b</sup>               | 93.33(11)  | O8- Co1- O9                             | 58.41(9)   |
| O8- Co1- O13 <sup>b</sup>               | 85.95(11)  | O9- Co1- O13 <sup>b</sup>               | 93.14(9)   |
| N2 <sup>c</sup> - Co2- N4 <sup>d</sup>  | 95.50(11)  | N2 <sup>c</sup> - Co2- O7 <sup>e</sup>  | 90.01(11)  |
| N2 <sup>c</sup> - Co2- O15              | 167.65(10) | N2 <sup>c</sup> - Co2- O18 <sup>f</sup> | 88.81(12)  |
| N4 <sup>d</sup> - Co2- O7 <sup>e</sup>  | 93.43(11)  | N4 <sup>d</sup> - Co2- O15              | 96.82(11)  |
| N4 <sup>d</sup> - Co2- O18 <sup>f</sup> | 92.83(12)  | O7 <sup>e</sup> - Co2- O15              | 90.09(11)  |
| O7 <sup>e</sup> - Co2- O18 <sup>f</sup> | 173.71(10) | O15 - Co2- O18 <sup>f</sup>             | 89.74(11)  |
| O3 - Co3- O6 <sup>e</sup>               | 170.59(10) | O3 - Co3- O9                            | 89.93(10)  |
| O3 - Co3- O14                           | 88.76(10)  | O3 - Co3- O19 <sup>f</sup>              | 85.13(10)  |
| O3 - Co3- O1w                           | 89.03(11)  | O6 <sup>e</sup> - Co3- O9               | 95.52(8)   |

|                             |           |                                         |            |
|-----------------------------|-----------|-----------------------------------------|------------|
| O6 <sup>e</sup> - Co3- O14  | 85.11(9)  | O6 <sup>e</sup> - Co3- O19 <sup>f</sup> | 102.24(9)  |
| O6 <sup>e</sup> - Co3- O1w  | 83.97(9)  | O9 - Co3- O14                           | 174.63(10) |
| O9 - Co3- O19 <sup>f</sup>  | 92.52(9)  | O9 - Co3- O1w                           | 83.67(10)  |
| O14 - Co3- O19 <sup>f</sup> | 92.56(10) | O14 - Co3- O1w                          | 91.10(11)  |
| O19 <sup>f</sup> - Co3- O1w | 173.03(9) |                                         |            |

#### Complex 4

|                                         |            |                                         |            |
|-----------------------------------------|------------|-----------------------------------------|------------|
| Ni1- N2                                 | 2.099(3)   | Ni1- N3 <sup>a</sup>                    | 2.155(3)   |
| Ni1- O2                                 | 2.005(2)   | Ni1- O8                                 | 2.076(2)   |
| Ni1- O9                                 | 2.277(2)   | Ni1- O13 <sup>b</sup>                   | 2.072(2)   |
| Ni2- N1c                                | 2.154(3)   | Ni2- N4d                                | 2.102(3)   |
| Ni2- O7e                                | 2.050(2)   | Ni2- O15                                | 2.045(2)   |
| Ni2- O18 <sup>f</sup>                   | 1.993(2)   | Ni3- O3                                 | 2.073(2)   |
| Ni3- O6e                                | 2.191(2)   | Ni3- O9                                 | 2.202(2)   |
| Ni3- O14                                | 2.075(3)   | Ni3- O19 <sup>f</sup>                   | 2.029(3)   |
| Ni3- O1w                                | 2.034(2)   | N2 - Ni1- N3a                           | 88.88(11)  |
| N2 - Ni1- O2                            | 99.80(11)  | N2 - Ni1- O8                            | 96.65(11)  |
| N2 - Ni1- O9                            | 153.80(10) | N2 - Ni1- O13b                          | 83.00(10)  |
| N3a - Ni1- O2                           | 90.20(11)  | N3a - Ni1- O8                           | 90.77(11)  |
| N3a - Ni1- O9                           | 90.42(9)   | N3a - Ni1- O13b                         | 171.70(10) |
| O2- Ni1- O8                             | 163.53(10) | O2- Ni1- O9                             | 106.39(9)  |
| O2- Ni1- O13 <sup>b</sup>               | 92.87(10)  | O8- Ni1- O9                             | 57.16(9)   |
| O8- Ni1- O13 <sup>b</sup>               | 88.46(10)  | O9- Ni1- O13 <sup>b</sup>               | 96.10(9)   |
| N1 <sup>c</sup> - Ni2- N4 <sup>d</sup>  | 94.65(11)  | N1 <sup>c</sup> - Ni2- O7 <sup>e</sup>  | 88.78(10)  |
| N1 <sup>c</sup> - Ni2- O15              | 167.60(10) | N1 <sup>c</sup> - Ni2- O18 <sup>f</sup> | 88.39(10)  |
| N4 <sup>d</sup> - Ni2- O7 <sup>e</sup>  | 94.33(10)  | N4 <sup>d</sup> - Ni2- O15              | 97.63(11)  |
| N4 <sup>d</sup> - Ni2- O18 <sup>f</sup> | 92.36(11)  | O7 <sup>e</sup> - Ni2- O15              | 91.99(10)  |
| O7 <sup>e</sup> - Ni2- O18 <sup>f</sup> | 172.93(10) | O15 - Ni2- O18 <sup>f</sup>             | 89.39(10)  |
| O3 - Ni3- O6 <sup>e</sup>               | 169.13(10) | O3 - Ni3- O9                            | 88.94(9)   |
| O3 - Ni3- O14                           | 87.17(9)   | O3 - Ni3- O19 <sup>f</sup>              | 84.70(10)  |
| O3 - Ni3- O1w                           | 87.63(10)  | O6 <sup>e</sup> - Ni3- O9               | 98.21(9)   |

|                             |           |                                         |            |
|-----------------------------|-----------|-----------------------------------------|------------|
| O6 <sup>e</sup> - Ni3- O14  | 84.90(9)  | O6 <sup>e</sup> - Ni3- O19 <sup>f</sup> | 103.17(9)  |
| O6 <sup>e</sup> - Ni3- O1w  | 84.89(9)  | O9 - Ni3- O14                           | 173.30(10) |
| O9 - Ni3- O19 <sup>f</sup>  | 91.60(9)  | O9 - Ni3- O1w                           | 84.85(10)  |
| O14 - Ni3- O19 <sup>f</sup> | 93.47(10) | O14 - Ni3- O1w                          | 89.54(11)  |
| O19 <sup>f</sup> - Ni3- O1w | 171.61(9) |                                         |            |

### Complex 5

|                           |            |                                        |            |
|---------------------------|------------|----------------------------------------|------------|
| Ni1- N1                   | 2.087(2)   | Ni1- N2 <sup>a</sup>                   | 2.0709(19) |
| Ni1- O2                   | 2.0816(17) | Ni1- O3                                | 2.2535(18) |
| Ni1- O4 <sup>b</sup>      | 2.0327(17) | Ni1- O6                                | 2.0586(18) |
| N1 - Ni1- N2 <sup>a</sup> | 88.74(8)   | N1 - Ni1- O2                           | 93.45(7)   |
| N1 - Ni1- O3              | 89.09(7)   | N1 - Ni1- O4 <sup>b</sup>              | 89.19(7)   |
| N1 - Ni1- O6              | 178.66(8)  | N2 <sup>a</sup> - Ni1- O2              | 93.84(7)   |
| N2 <sup>a</sup> - Ni1- O3 | 153.87(7)  | N2 <sup>a</sup> - Ni1- O4 <sup>b</sup> | 93.94(8)   |
| N2 <sup>a</sup> - Ni1- O6 | 92.51(8)   | O2 - Ni1- O3                           | 60.31(7)   |
| O2 - Ni1- O4 <sup>b</sup> | 171.84(7)  | O2 - Ni1- O6                           | 92.51(8)   |
| O3 - Ni1- O4 <sup>b</sup> | 112.07(7)  | O3 - Ni1- O6                           | 90.01(7)   |
| O4 <sup>b</sup> - Ni1- O6 | 90.22(7)   |                                        |            |

Symmetry codes: for **1**: a = -0.5 + x, 1 - y, z; b = -0.25 + y, 0.25 + x, 0.25 - z. for **2**: a = x, y, 1 + z; b = 1 + x, y, z. for **3**: a = -x, -y, -z; b = 3 - x, 1 - y, -z; c = 2 - x, 1 - y, -z; d = 1 + x, 1 + y, 1 + z; e = 1 + x, 1 + y, z; f = 2 - x, -y, 1 - z. for **4**: a = -x, 1 - y, 1 - z; b = 2 - x, -y, 1 - z; c = 1 - x, -y, 1 - z; d = 1 + x, -1 + y, -1 + z; e = 1 + x, -1 + y, z; f = 1 - x, 1 - y, -z. for **5**: a = x, y, -1 + z; b = 1 + x, y, z.
